# Supplementary material
Source: ML conference proceedings conference paper supplement (https://openreview.net/forum?id=S98VJL8jcxq)

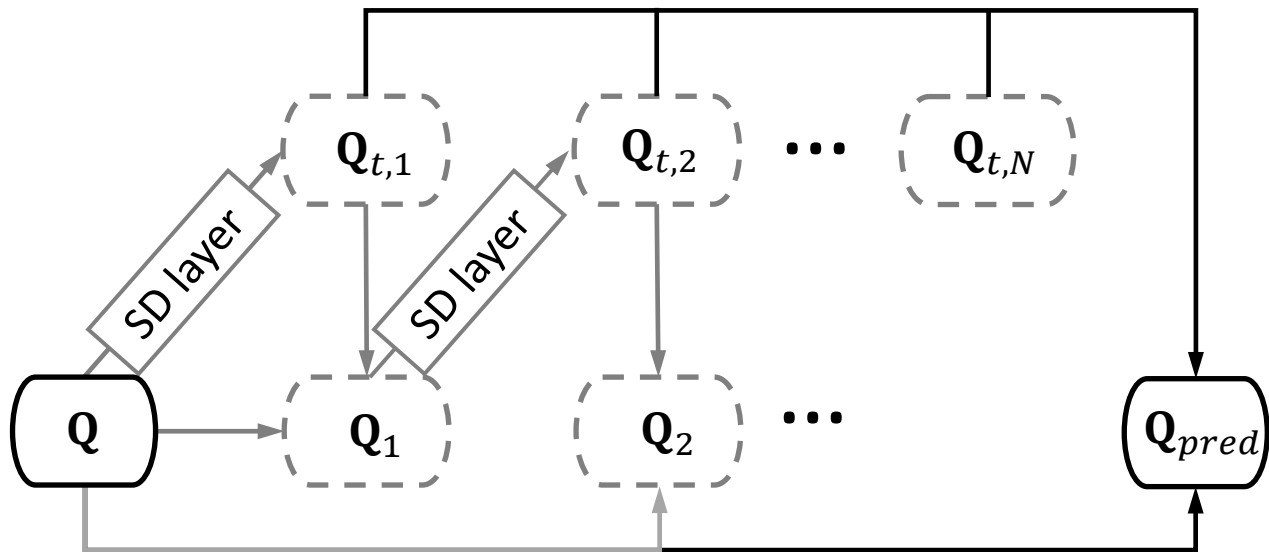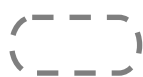

Intermediate  
virtual points

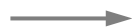

Network layers to  
compute virtual points

Supplement: supplementary_material [file attachment]

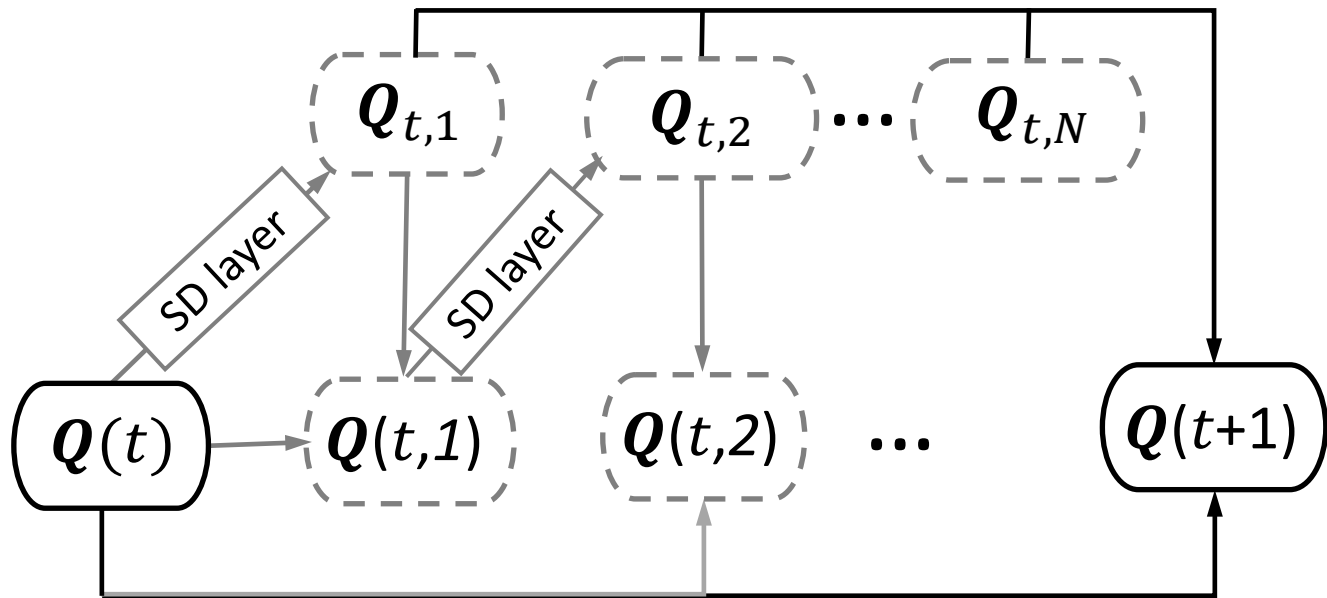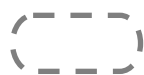

Intermediate  
virtual points

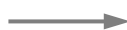

Network layers to  
compute virtual points

Supplement: supplementary_material [file attachment]

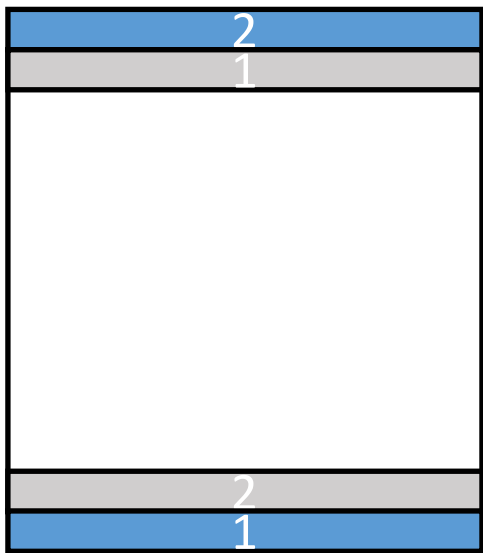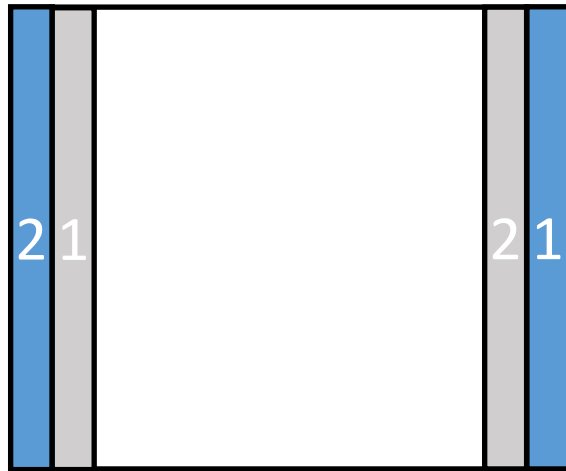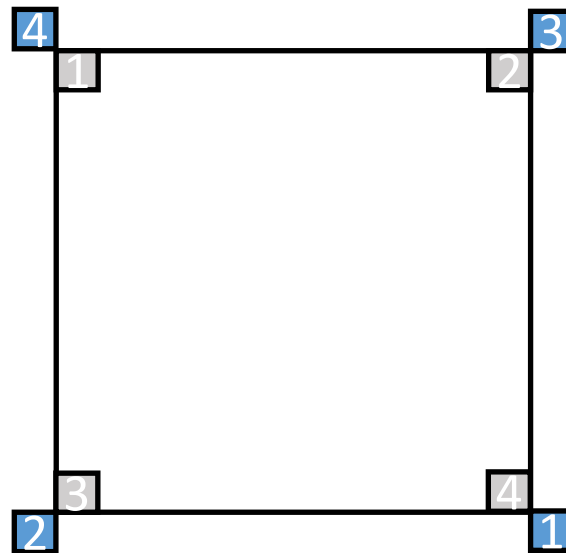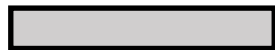

Real values on the boundary

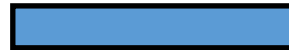

Augmented values

Supplement: supplementary_material [file attachment]

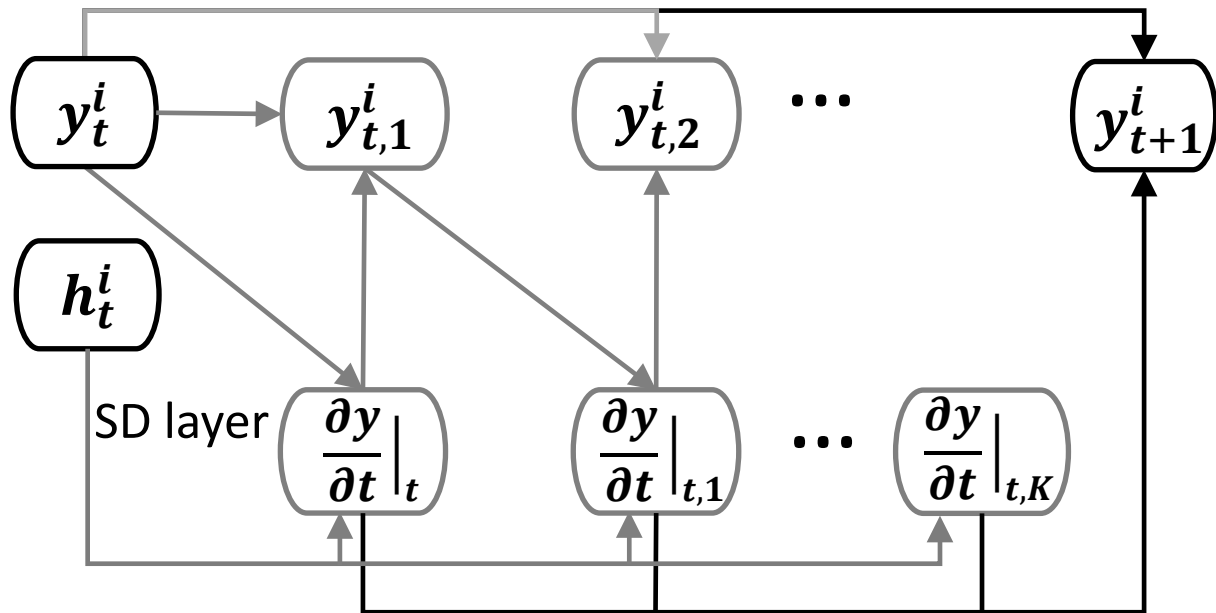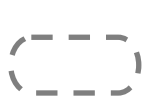

Intermediate  
latent variables

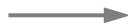

Network layers to  
compute latent variables

Supplement: supplementary_material [file attachment]

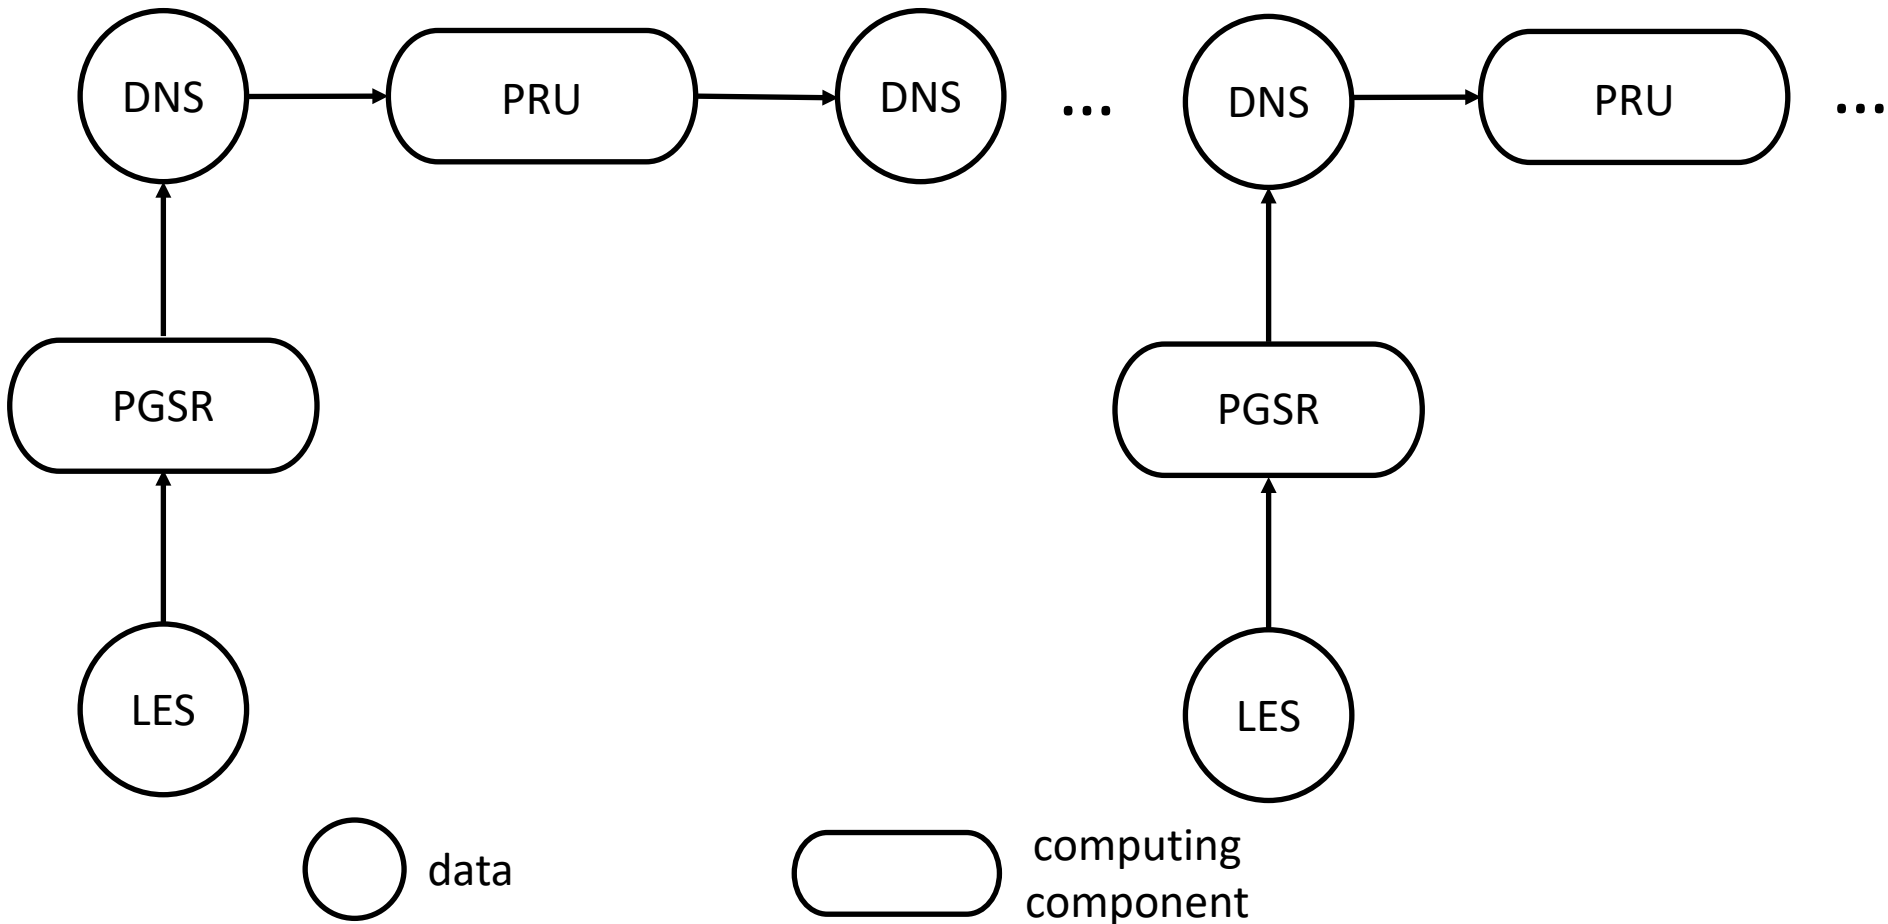

Supplement: supplementary_material [file attachment]

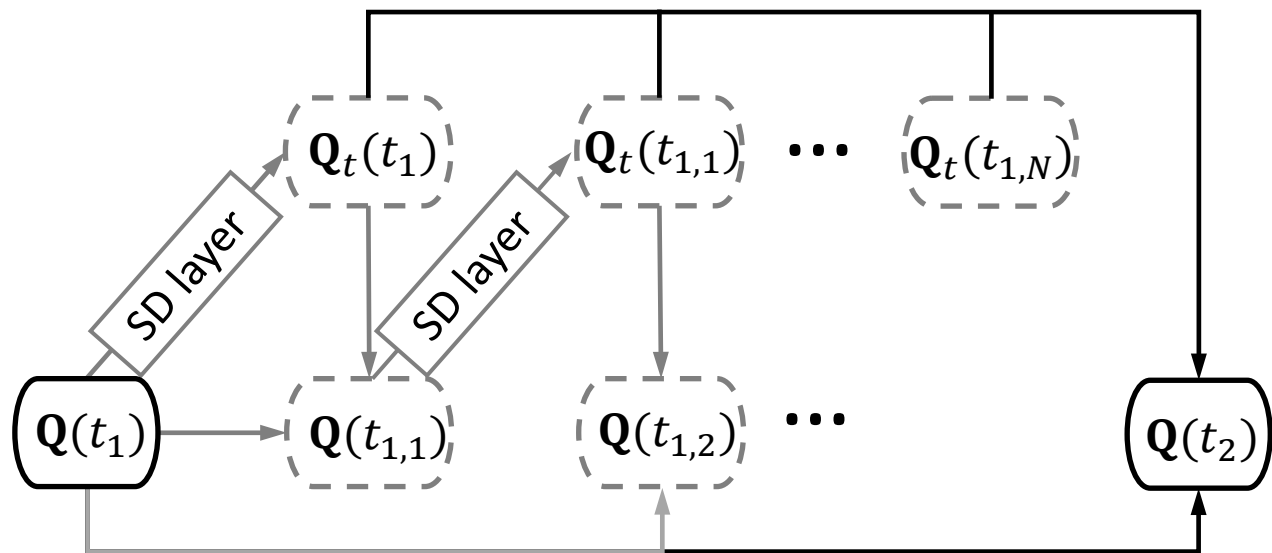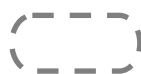

Intermediate  
virtual points

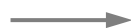

Network layers to  
compute virtual points

Supplement: supplementary_material [file attachment]

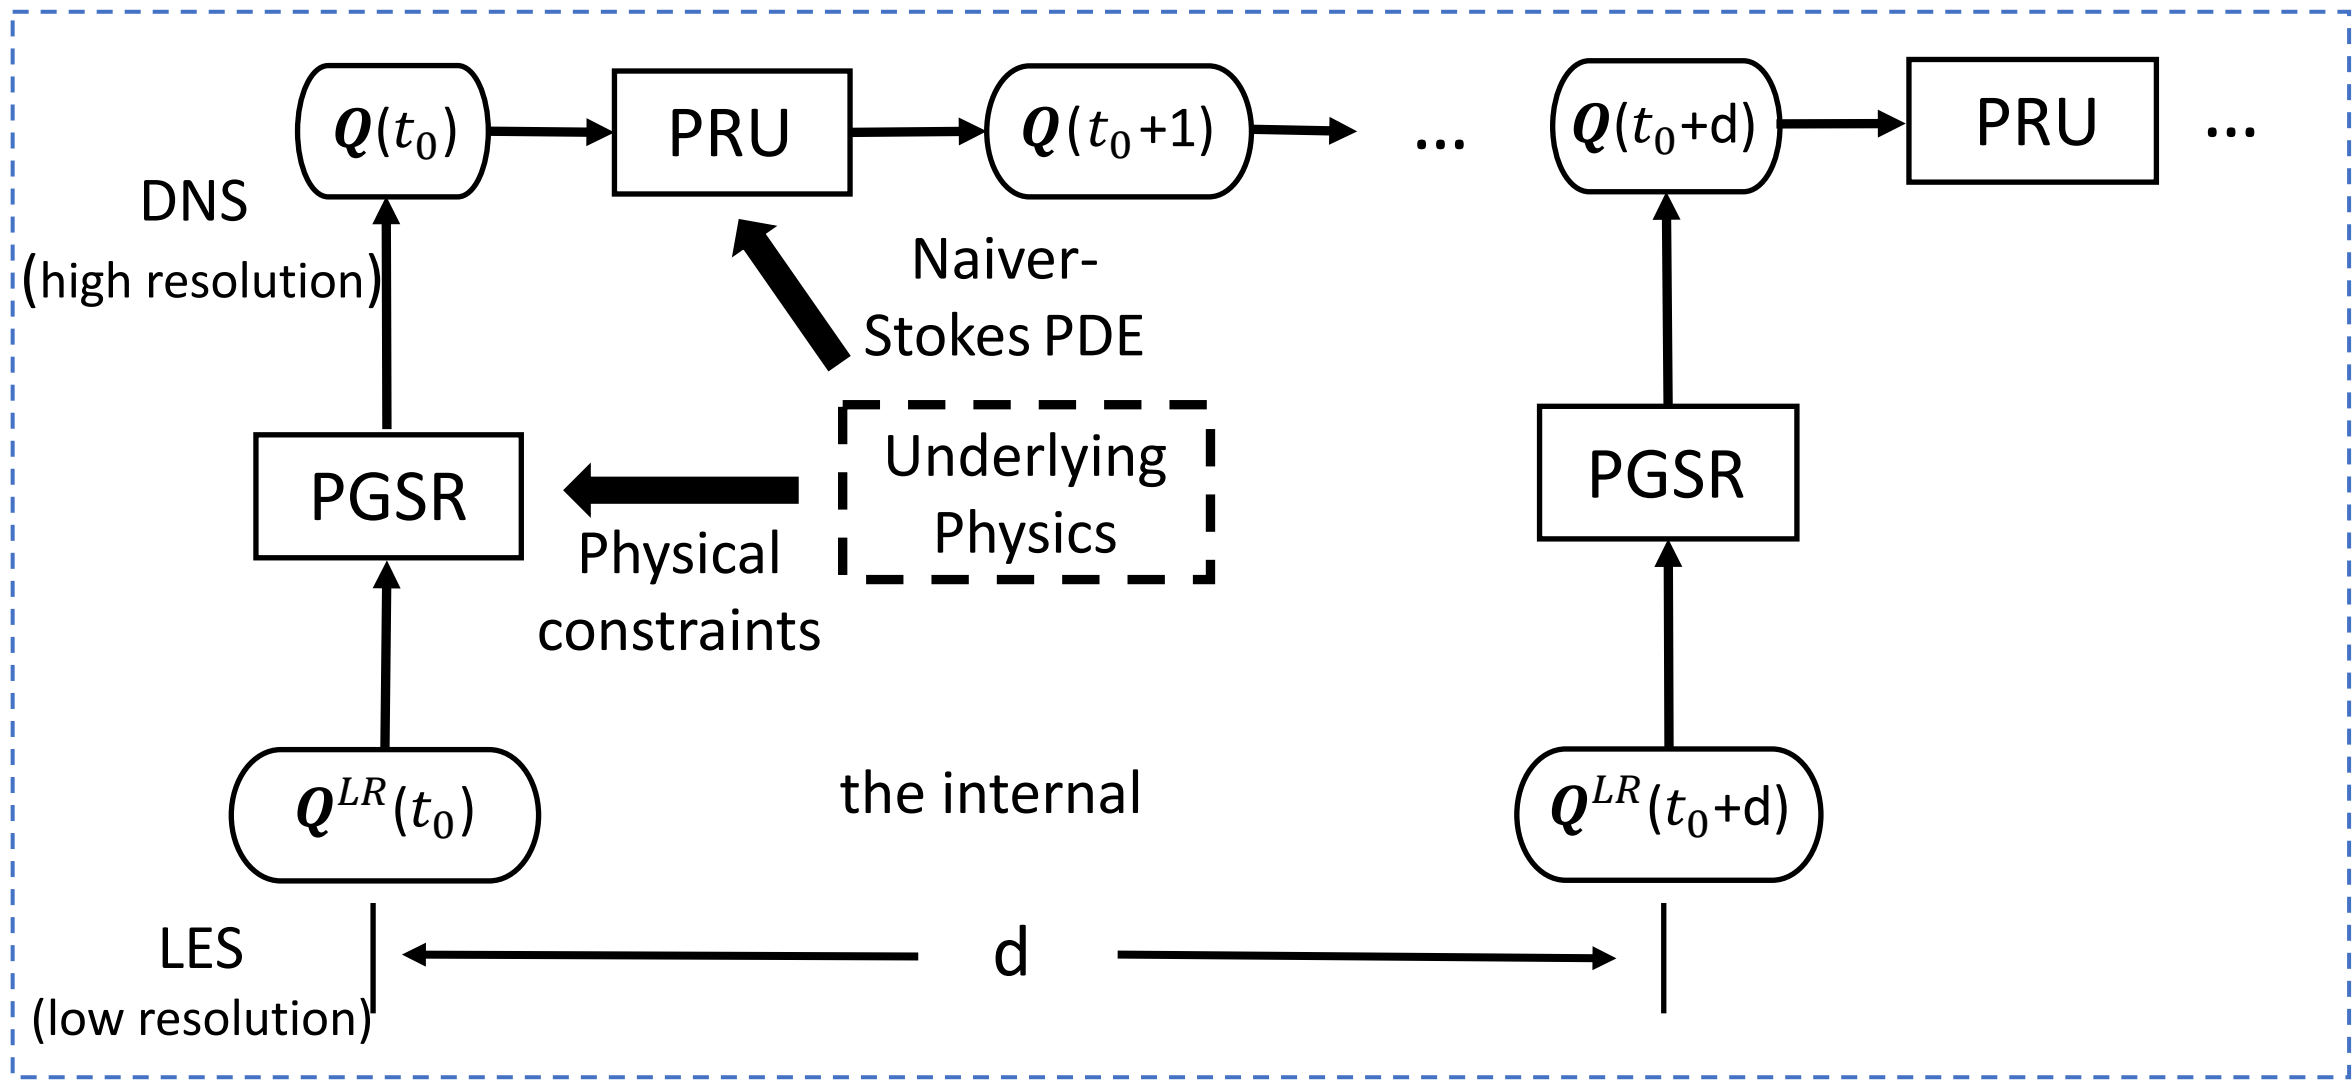

Supplement: supplementary_material [file attachment]
